# Supplementary material for: Effect of snowfall on changes in relative seismic velocity measured by ambient noise correlation
Source: Copernicus journal article supplement (doi:10.5194/tc-2021-108), 2021-05-11
Supplement: Supplementary file [file tc-2021-108-AC1-supplement.pdf]

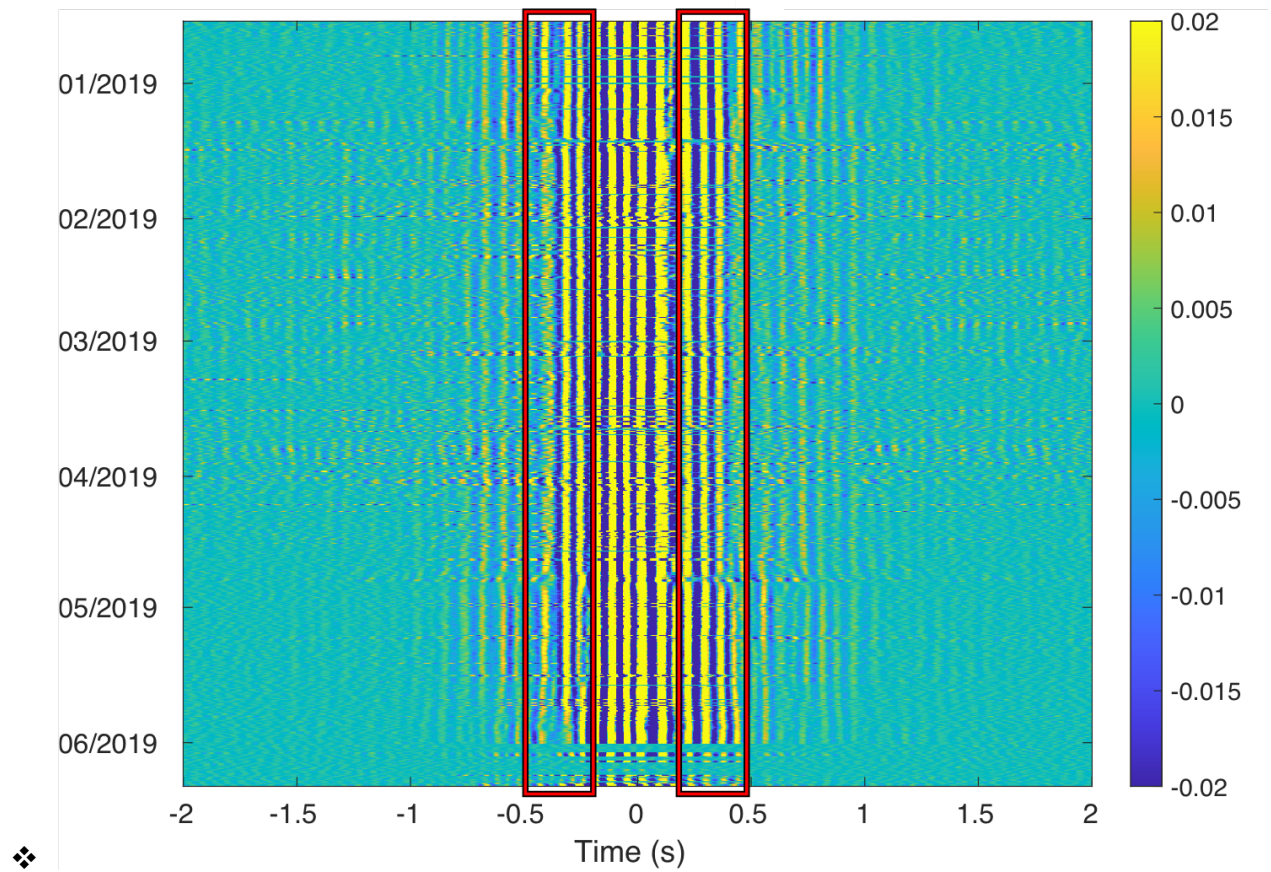

❖ Figure 1 : Normalized correlogram from raw seismic noise cross-correlations over the pair of geophones used for the study. The time windows from which the  $dV/V$  values are estimated are localized by red boxes, corresponding to direct (positive) and indirect (negative) coda part of the waveforms.

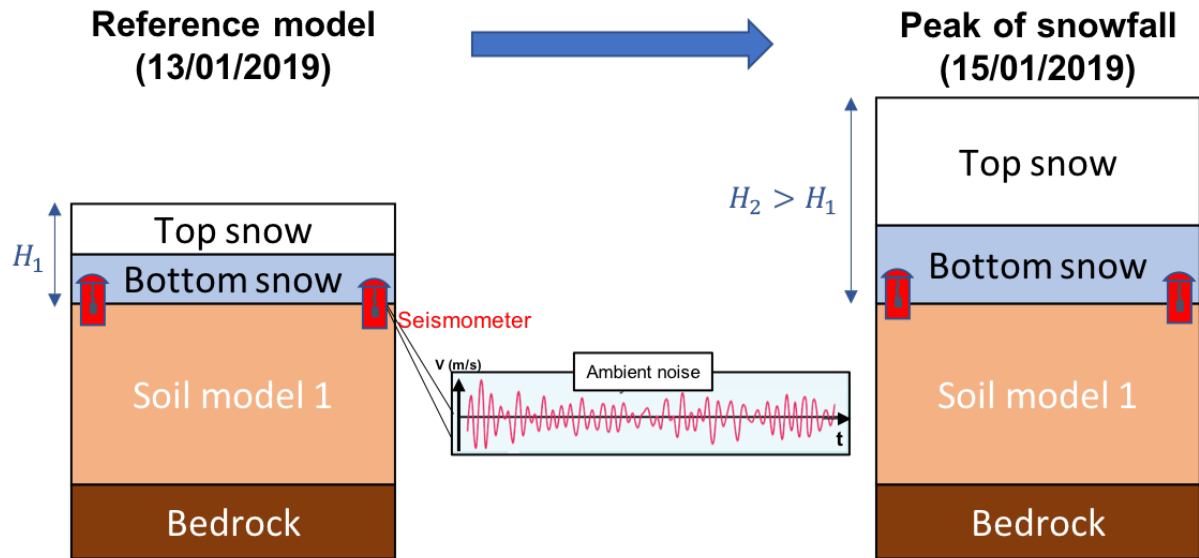

Figure 2 : Schematic 1-D cross-section of the instrumentation of the study site, with the location of seismic sensors buried in shallow subsurface, and the modelled layered medium at two temporal steps (before and during peak of snowfall event 2, as an example). The only changes between these models is the increasing snow depth and mechanical properties of both snow layers, as precised in Table 4.
